# Supplementary material
Source: HighWire-hosted journal article supplement (https://bmjopen.bmj.com/content/10/9/e038543)
Supplement: inline-supplementary-material-2 [file inline-supplementary-material-2.pdf]

Supplementary Table. Socio-demographic and clinical characteristics within sub-groups

| Socio-demographic and clinical characteristics within sub-groups (percentages) |                                     |                                     |                                     |                                     |                  |            |
|--------------------------------------------------------------------------------|-------------------------------------|-------------------------------------|-------------------------------------|-------------------------------------|------------------|------------|
| Socio-demo                                                                     | Centre 1<br>Observational<br>(N=70) | Centre 1<br>Experimental<br>(N=100) | Centre 2<br>Experimental<br>(N=100) | Centre 3<br>Experimental<br>(N=107) | Test             | p-Value    |
| Refusal rate                                                                   | 19%                                 | 19%                                 | 14%                                 | 20%                                 | $\chi^2 = 1.78$  | $p = 0.62$ |
| Employment Status                                                              |                                     |                                     |                                     |                                     | $\chi^2 = 2.64$  | $p = 0.85$ |
| Employed                                                                       | 41%                                 | 40%                                 | 46%                                 | 46%                                 |                  |            |
| Non-employed                                                                   | 24%                                 | 28%                                 | 29%                                 | 27%                                 |                  |            |
| Retired                                                                        | 34%                                 | 32%                                 | 25%                                 | 27%                                 |                  |            |
| Marital Status                                                                 |                                     |                                     |                                     |                                     | $\chi^2 = 2.93$  | $p = 0.40$ |
| Married/Cohabitant                                                             | 63%                                 | 70%                                 | 73%                                 | 64%                                 |                  |            |
| Single (Widowed/Divorced)                                                      | 37%                                 | 30%                                 | 27%                                 | 36%                                 |                  |            |
| Education                                                                      |                                     |                                     |                                     |                                     | $\chi^2 = 4.39$  | $p = 0.22$ |
| Primary/Secondary School                                                       | 43%                                 | 54%                                 | 48%                                 | 40%                                 |                  |            |
| High School/University                                                         | 57%                                 | 46%                                 | 52%                                 | 60%                                 |                  |            |
| Age (mean $\pm$ standard deviation)                                            | 58 $\pm$ 9.7                        | 58 $\pm$ 10.5                       | 57 $\pm$ 9.5                        | 55 $\pm$ 10.7                       | $F = 1.50$       | $p = 0.22$ |
| Therapy§                                                                       |                                     |                                     |                                     |                                     |                  |            |
| Chemotherapy prescribed                                                        | 27%                                 | 36%                                 | 35%                                 | 35%                                 | $\chi^2 = 1.66$  | $p = 0.64$ |
| Hormonal therapy prescribed                                                    | 67%                                 | 76%                                 | 84%                                 | 74%                                 | $\chi^2 = 6.96$  | $p = 0.07$ |
| Radiotherapy prescribed                                                        | 66%                                 | 62%                                 | 60%                                 | 77%                                 | $\chi^2 = 7.54$  | $p = 0.06$ |
| Immunotherapy prescribed                                                       | 9%                                  | 8%                                  | 4%                                  | 7%                                  | $\chi^2 = 1.91$  | $p = 0.59$ |
| Cancer stage ***                                                               |                                     |                                     |                                     |                                     | $\chi^2 = 21.81$ | $p = 0.01$ |
| Stage 0                                                                        | 38%                                 | 20%                                 | 31%                                 | 21%                                 |                  |            |
| Stage I                                                                        | 45%                                 | 55%                                 | 36%                                 | 44%                                 |                  |            |
| Stage II                                                                       | 8%                                  | 17%                                 | 22%                                 | 31%                                 |                  |            |
| Stage III                                                                      | 9%                                  | 7%                                  | 10%                                 | 5%                                  |                  |            |

Significant parameters are written in bold  
§ more than a therapy could be prescribed to each patient  
\*\*\* 22 missing info
